# Supplementary material for: Protein-induced membrane asymmetry modulates OMP folding kinetics and stability
Source: Royal Society of Chemistry journal article supplement (doi:10.1039/d4fd00180j), 2025-01-01
Supplement: d4fd00180j1.pdf [file d4fd00180j1.pdf]

### Supplementary Figures

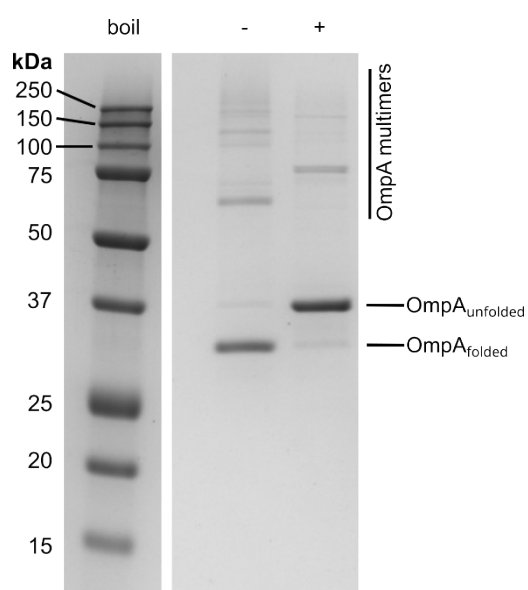

**Supplementary Figure 1: OmpA bandshifts in cold SDS-PAGE depending on its folding state.** The transmembrane domain of OmpA forms an SDS resistant fold in the absence of boiling, which causes a bandshift of folded (unboiled) compared to unfolded (boiled) OmpA, with the folded form running with a lower apparent molecular weight. Minor subpopulations of OmpA can self-associate to form a range of oligomeric species, even in the unfolded state.

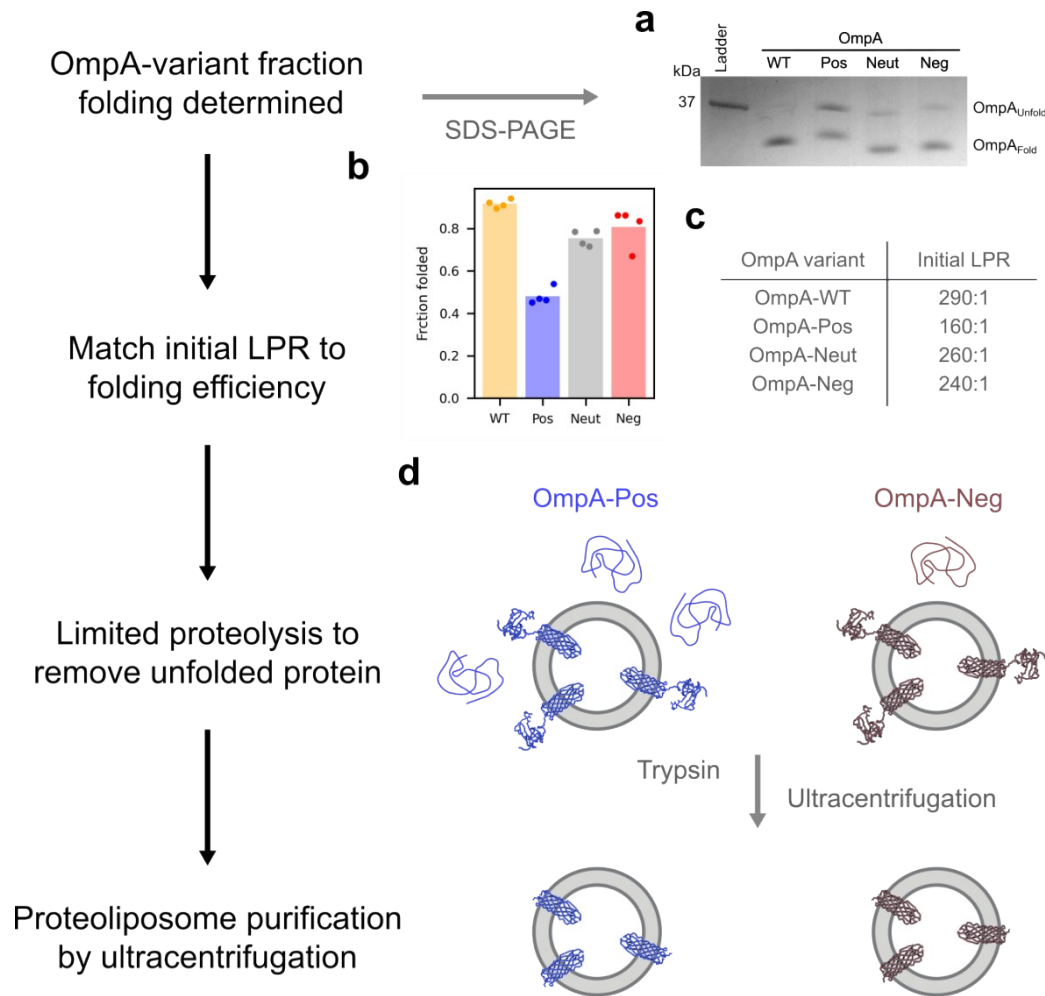

**Supplementary Figure 2: Method to generate LPR matched proteoliposomes with OmpA charge variants.** Initially the folding efficiency of each OmpA variant was assessed by cold SDS-PAGE (**a**), which enabled the fraction folded, membrane inserted protein to be determined (**b**). Guided by the fraction folded, the initial LPR was calculated such that the final, folded OmpA LPR should be 320:1 (**c**). Following folding, different amounts of unfolded protein remained in solution (**d**), which were then cleaved, along with OmpA's C-terminal domain, using trypsin. The LPR matched proteoliposomes were then purified via ultracentrifugation and validated (see **Figure 3**).

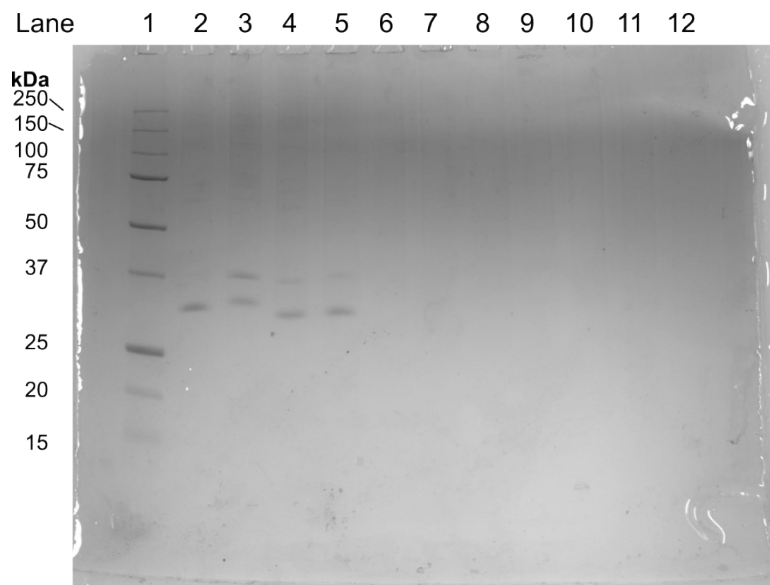

**Supplementary Figure 3: Original SDS PAGE gel image for Figure 3d.** Lane 1: ladder, 2: DLPC + OmpA-WT, 3: DLPC + OmpA-Pos, 4: DLPC + OmpA-Neut, 5: DLPC + OmpA-Neg, 6-12: empty.

Lane 1 2 3 4 5 6 7 8 9 10 11 12

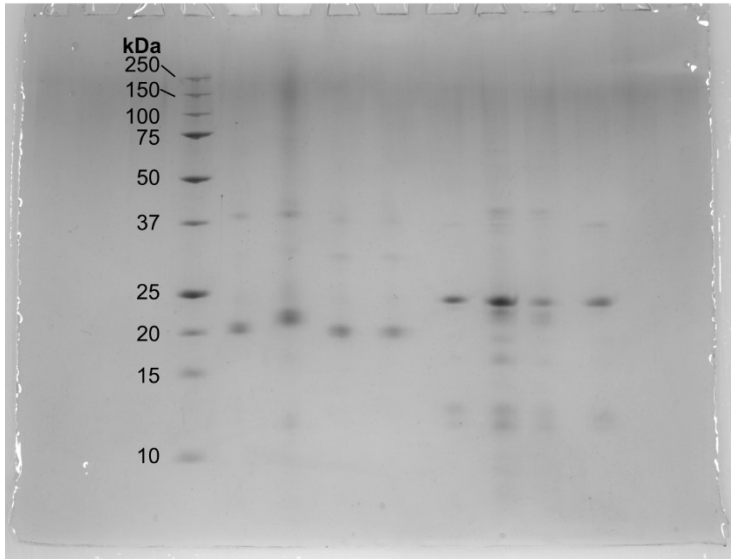

**Supplementary Figure 4: Original SDS PAGE gel image for Figure 3e.** Lane 1-2: empty, 3: ladder, 4: DLPC + bOmpA-WT, 5: DLPC + bOmpA-Pos, 6: DLPC + bOmpA-Neut, 7: DLPC + bOmpA-Neg, 8: DLPC + bOmpA-WT boiled, 9: DLPC + bOmpA-Pos boiled, 10: DLPC + bOmpA-Neut boiled, 11: DLPC + bOmpA-Neg boiled, 12: empty. The lower molecular weight bands in the lanes of boiled samples indicate some of the bOmpA is also cleaved, however, as the same sample migrates as a single-band in the unboiled lanes, a single intact barrel structure must be retained, thus the generated dipoles should not be affected by this population.
